# Supplementary material for: An integrated approach of gene expression and DNA-methylation profiles of WNT signaling genes uncovers novel prognostic markers in Acute Myeloid Leukemia
Source: PubMed Central journal article supplement (PMC4347618; doi:10.1186/1471-2105-16-s4-s4), 2015-02-23

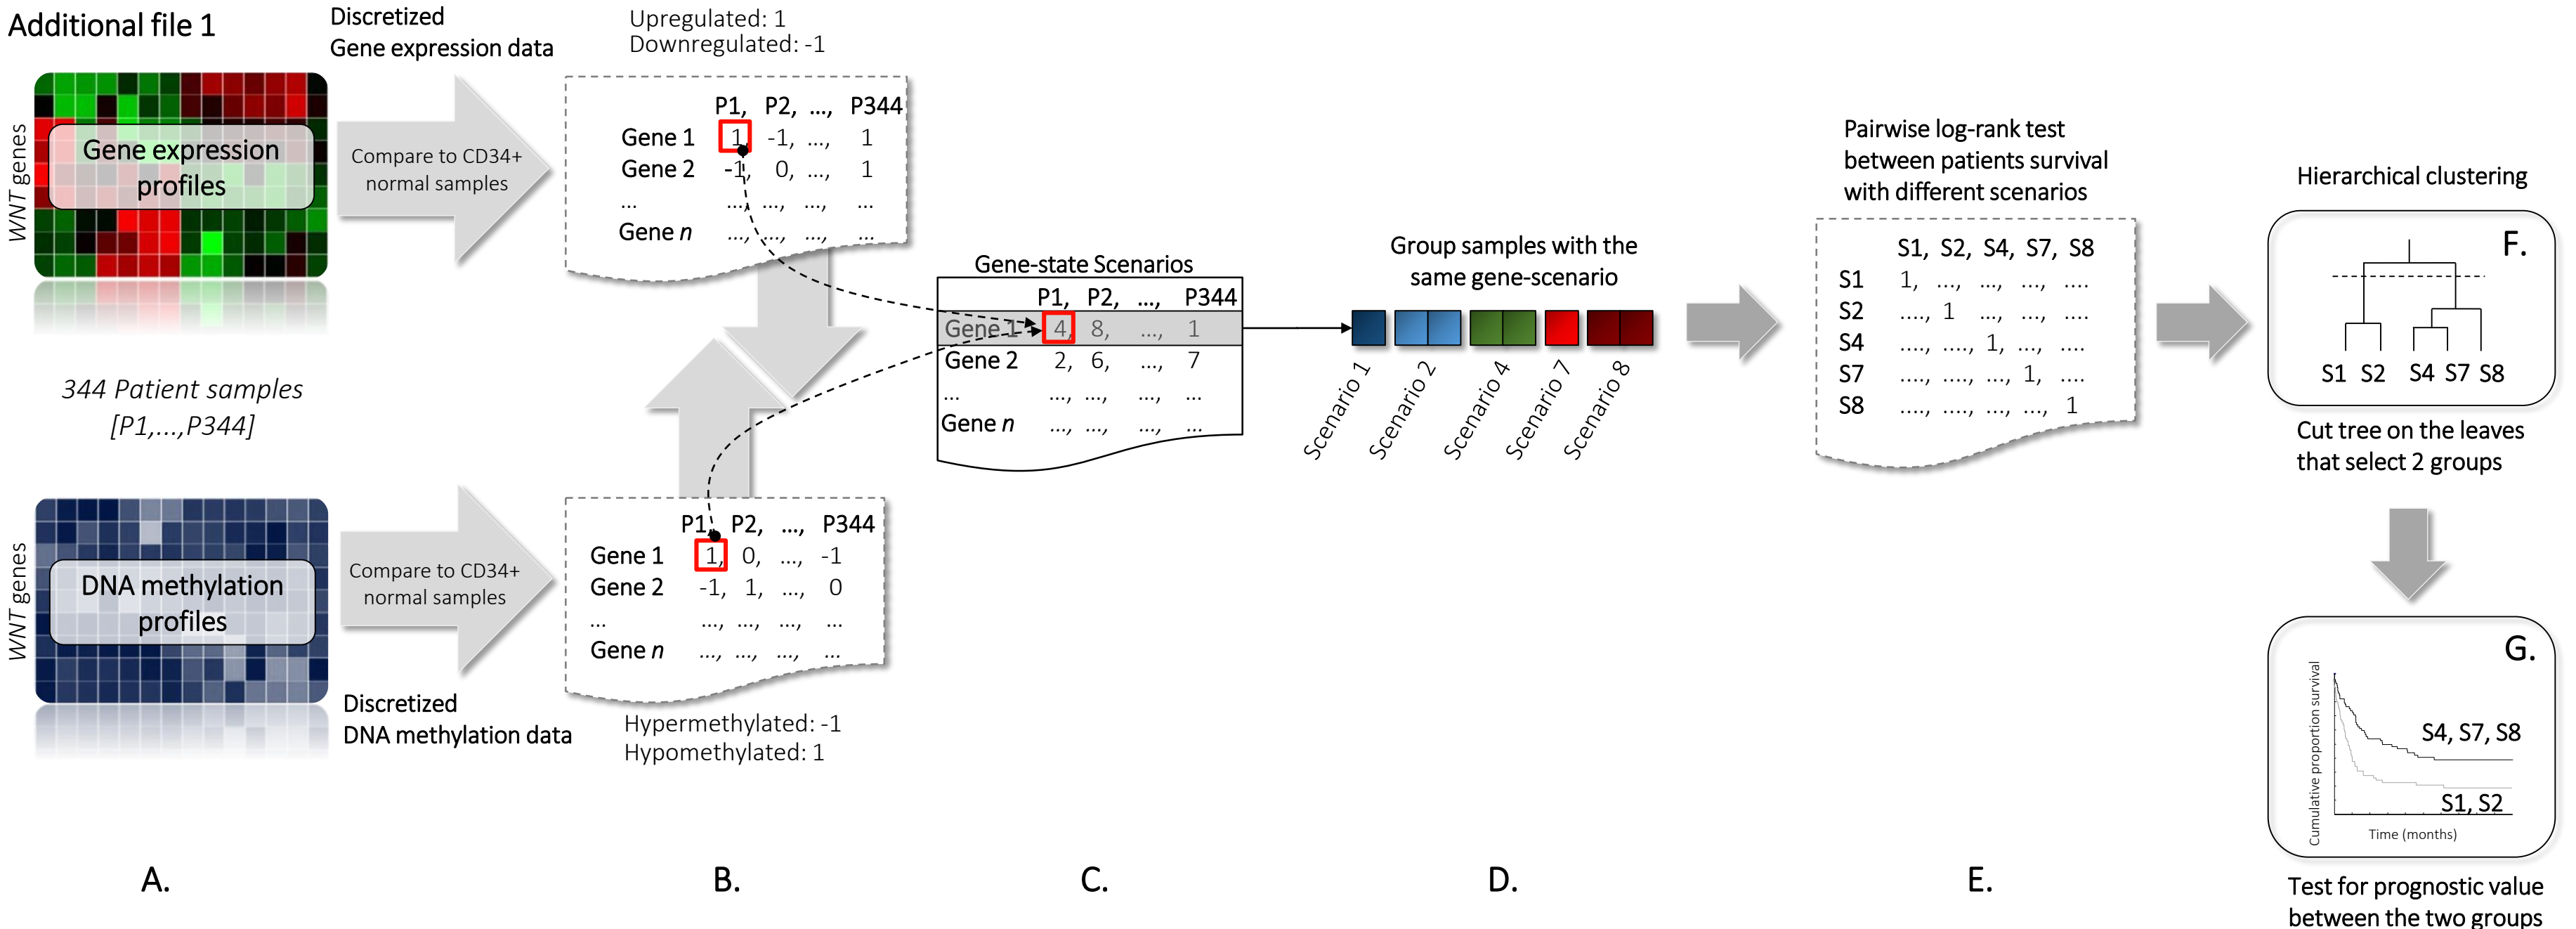

Upregulated: 1  
Downregulated: -1

|        | P1  | P2  | ... | P344 |
|--------|-----|-----|-----|------|
| Gene 1 | 1   | -1  | ... | 1    |
| Gene 2 | -1  | 0   | ... | 1    |
| ...    | ... | ... | ... | ...  |
| Gene n | ... | ... | ... | ...  |

**Gene-state Scenarios**

|        | P1  | P2  | ... | P344 |
|--------|-----|-----|-----|------|
| Gene 1 | 4   | 8   | ... | 1    |
| Gene 2 | 2   | 6   | ... | 7    |
| ...    | ... | ... | ... | ...  |
| Gene n | ... | ... | ... | ...  |

Pairwise log-rank test between patients survival with different scenarios

|    | S1  | S2  | S4  | S7  | S8  |
|----|-----|-----|-----|-----|-----|
| S1 | 1   | ... | ... | ... | ... |
| S2 | ... | 1   | ... | ... | ... |
| S4 | ... | ... | 1   | ... | ... |
| S7 | ... | ... | ... | 1   | ... |
| S8 | ... | ... | ... | ... | 1   |

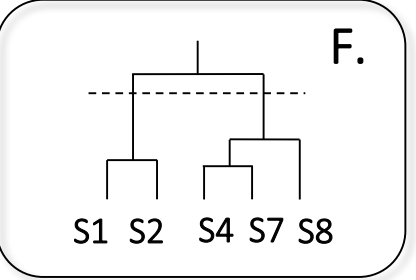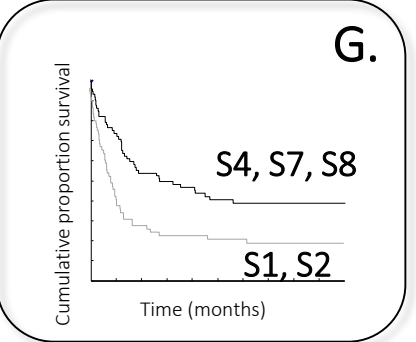

Supplement: 1471-2105-16-S4-S4-S1.pdf [file 1471-2105-16-S4-S4-S1.pdf]
