# Supplementary material for: An integrated approach of gene expression and DNA-methylation profiles of WNT signaling genes uncovers novel prognostic markers in Acute Myeloid Leukemia
Source: PubMed Central journal article supplement (PMC4347618; doi:10.1186/1471-2105-16-s4-s4), 2015-02-23
Supplement: 1471-2105-16-S4-S4-S3.pdf [file 1471-2105-16-S4-S4-S3.pdf]

Additional file 3.

| Variables                                    | P-value  | HR   | 95% CI-low | CI-high |
|----------------------------------------------|----------|------|------------|---------|
| <b>Event-free survival</b>                   |          |      |            |         |
| <i>LEF1</i> (scenario 8)                     | 0.01247  | 1.51 | 1.09       | 2.08    |
| <i>CEBPA</i> <sup>dma</sup>                  | 0.00647  | 0.44 | 0.24       | 0.79    |
| <i>FLT3</i> <sup>ITD β</sup>                 | 0.00056  | 1.71 | 1.26       | 2.31    |
| <i>NPM1</i> <sup>+ β</sup>                   | 0.00003  | 0.51 | 0.37       | 0.70    |
| WBC count <sup>δ</sup> , x10 <sup>9</sup> /L | 0.00972  | 1.00 | 1.00       | 1.00    |
| Age <sup>§</sup>                             | 0.00501  | 1.01 | 1.00       | 1.02    |
| <b>Event-free survival</b>                   |          |      |            |         |
| <i>SFRP2</i> (scenario 2, 8)                 | 0.00022  | 2.11 | 1.42       | 3.13    |
| <i>CEBPA</i> <sup>dma</sup>                  | 0.00550  | 0.43 | 0.24       | 0.78    |
| <i>FLT3</i> <sup>ITD β</sup>                 | 0.00012  | 1.83 | 1.35       | 2.49    |
| <i>NPM1</i> <sup>+ β</sup>                   | 0.00003  | 0.51 | 0.37       | 0.70    |
| WBC count <sup>δ</sup> , x10 <sup>9</sup> /L | 0.00470  | 1.00 | 1.00       | 1.00    |
| Age <sup>§</sup>                             | 0.00660  | 1.01 | 1.00       | 1.02    |
| <b>Event-free survival</b>                   |          |      |            |         |
| <i>RUNX1</i> (scenario 3)                    | 0.14587  | 1.25 | 0.93       | 1.69    |
| <i>CEBPA</i> <sup>dma</sup>                  | 0.00779  | 0.45 | 0.25       | 0.81    |
| <i>FLT3</i> <sup>ITD β</sup>                 | 0.00033  | 1.74 | 1.29       | 2.36    |
| <i>NPM1</i> <sup>+ β</sup>                   | 0.00002  | 0.51 | 0.37       | 0.69    |
| WBC count <sup>δ</sup> , x10 <sup>9</sup> /L | 0.01130  | 1.00 | 1.00       | 1.00    |
| Age <sup>§</sup>                             | 0.00169  | 1.02 | 1.01       | 1.02    |
| <b>Event-free survival</b>                   |          |      |            |         |
| <i>PSMD2</i> (scenario 5)                    | 0.01651  | 0.71 | 0.54       | 0.94    |
| <i>CEBPA</i> <sup>dma</sup>                  | 0.00331  | 0.41 | 0.23       | 0.75    |
| <i>FLT3</i> <sup>ITD β</sup>                 | 0.00024  | 1.77 | 1.30       | 2.40    |
| <i>NPM1</i> <sup>+ β</sup>                   | 0.00004  | 0.52 | 0.38       | 0.71    |
| WBC count <sup>δ</sup> , x10 <sup>9</sup> /L | 0.00330  | 1.00 | 1.00       | 1.01    |
| Age <sup>§</sup>                             | 0.00426  | 1.01 | 1.00       | 1.02    |
| <b>Event-free survival</b>                   |          |      |            |         |
| <i>XPNPEP</i> (scenario 1)                   | 0.00260  | 1.52 | 1.16       | 2.00    |
| <i>CEBPA</i> <sup>dma</sup>                  | 0.00240  | 0.40 | 0.22       | 0.72    |
| <i>FLT3</i> <sup>ITD β</sup>                 | 0.00140  | 1.64 | 1.21       | 2.23    |
| <i>NPM1</i> <sup>+ β</sup>                   | 0.00010  | 0.54 | 0.40       | 0.74    |
| WBC count <sup>δ</sup> , x10 <sup>9</sup> /L | 0.01530  | 1.00 | 1.00       | 1.00    |
| Age <sup>§</sup>                             | 0.00850  | 1.01 | 1.00       | 1.02    |
| <b>Event-free survival</b>                   |          |      |            |         |
| <i>PPARD</i> (scenario 4, 6)                 | 0.000005 | 0.43 | 0.30       | 0.61    |
| <i>CEBPA</i> <sup>dma</sup>                  | 0.00120  | 0.37 | 0.21       | 0.68    |
| <i>FLT3</i> <sup>ITD β</sup>                 | 0.00005  | 1.89 | 1.39       | 2.56    |
| <i>NPM1</i> <sup>+ β</sup>                   | 0.00041  | 0.56 | 0.41       | 0.77    |
| WBC count <sup>δ</sup> , x10 <sup>9</sup> /L | 0.00670  | 1.00 | 1.00       | 1.00    |
| Age <sup>§</sup>                             | 0.00058  | 1.02 | 1.01       | 1.03    |
| <b>Event-free survival</b>                   |          |      |            |         |
| <i>AXIN2</i> (scenario 8)                    | 0.01150  | 1.66 | 1.12       | 2.45    |
| <i>CEBPA</i> <sup>dma</sup>                  | 0.00270  | 0.40 | 0.22       | 0.73    |
| <i>FLT3</i> <sup>ITD β</sup>                 | 0.00045  | 1.72 | 1.27       | 2.33    |
| <i>NPM1</i> <sup>+ β</sup>                   | 0.00010  | 0.54 | 0.39       | 0.73    |
| WBC count <sup>δ</sup> , x10 <sup>9</sup> /L | 0.01010  | 1.00 | 1.00       | 1.00    |
| Age <sup>§</sup>                             | 0.00370  | 1.01 | 1.00       | 1.02    |
