# Supplementary material for: An integrated approach of gene expression and DNA-methylation profiles of WNT signaling genes uncovers novel prognostic markers in Acute Myeloid Leukemia
Source: PubMed Central journal article supplement (PMC4347618; doi:10.1186/1471-2105-16-s4-s4), 2015-02-23
Supplement: 1471-2105-16-S4-S4-S5.pdf [file 1471-2105-16-S4-S4-S5.pdf]

Additional file 5.

| Variables                                    | P-value        | HR   | 95% CI-low | CI-high |
|----------------------------------------------|----------------|------|------------|---------|
| <b>Overall survival</b>                      |                |      |            |         |
| <i>Cluster 1</i>                             | <b>0.00617</b> | 1.73 | 1.17       | 2.56    |
| High cytogenetic risk                        | 0.01237        | 1.80 | 1.14       | 2.86    |
| Low cytogenetic risk                         | 0.43231        | 1.17 | 0.79       | 1.74    |
| <i>FLT3<sup>ITD</sup>β</i>                   | 0.00005        | 1.91 | 1.40       | 2.61    |
| <i>NPM1<sup>+β</sup></i>                     | 0.00178        | 0.59 | 0.42       | 0.82    |
| WBC count <sup>δ</sup> , x10 <sup>9</sup> /L | 0.00290        | 1.00 | 1.00       | 1.01    |
| Age <sup>§</sup>                             | 0.00009        | 1.02 | 1.01       | 1.03    |
| <b>Event-free survival</b>                   |                |      |            |         |
| <i>Cluster 1</i>                             | <b>0.00429</b> | 1.77 | 1.20       | 2.62    |
| High cytogenetic risk                        | 0.00777        | 1.82 | 1.17       | 2.84    |
| Low cytogenetic risk                         | 0.41608        | 1.17 | 0.80       | 1.71    |
| <i>FLT3<sup>ITD</sup>β</i>                   | 0.00010        | 1.87 | 1.36       | 2.56    |
| <i>NPM1<sup>+β</sup></i>                     | 0.00065        | 0.57 | 0.41       | 0.79    |
| WBC count <sup>δ</sup> , x10 <sup>9</sup> /L | 0.00480        | 1.00 | 1.00       | 1.00    |
| Age <sup>§</sup>                             | 0.00517        | 1.01 | 1.00       | 1.02    |
| <b>Overall survival</b>                      |                |      |            |         |
| <i>Cluster 5</i>                             | <b>0.02728</b> | 1.49 | 1.05       | 2.14    |
| High cytogenetic risk                        | 0.03051        | 1.66 | 1.05       | 2.64    |
| Low cytogenetic risk                         | 0.67508        | 1.09 | 0.73       | 1.62    |
| <i>FLT3<sup>ITD</sup>β</i>                   | 0.00005        | 1.92 | 1.40       | 2.63    |
| <i>NPM1<sup>+β</sup></i>                     | 0.00232        | 0.60 | 0.43       | 0.83    |
| WBC count <sup>δ</sup> , x10 <sup>9</sup> /L | 0.00656        | 1.00 | 1.00       | 1.01    |
| Age <sup>§</sup>                             | 0.00006        | 1.02 | 1.01       | 1.03    |
| <b>Event-free survival</b>                   |                |      |            |         |
| <i>Cluster 5</i>                             | <b>0.01886</b> | 1.50 | 1.07       | 2.11    |
| High cytogenetic risk                        | 0.02308        | 1.67 | 1.07       | 2.58    |
| Low cytogenetic risk                         | 0.65032        | 1.09 | 0.75       | 1.60    |
| <i>FLT3<sup>ITD</sup>β</i>                   | 0.00017        | 1.83 | 1.33       | 2.50    |
| <i>NPM1<sup>+β</sup></i>                     | 0.00142        | 0.59 | 0.42       | 0.81    |
| WBC count <sup>δ</sup> , x10 <sup>9</sup> /L | 0.00980        | 1.00 | 1.00       | 1.00    |
| Age <sup>§</sup>                             | 0.00593        | 1.01 | 1.00       | 1.02    |
