# Supplementary material for: An integrated approach of gene expression and DNA-methylation profiles of WNT signaling genes uncovers novel prognostic markers in Acute Myeloid Leukemia
Source: PubMed Central journal article supplement (PMC4347618; doi:10.1186/1471-2105-16-s4-s4), 2015-02-23

# DNA hypermethylated versus DNA hypomethylated

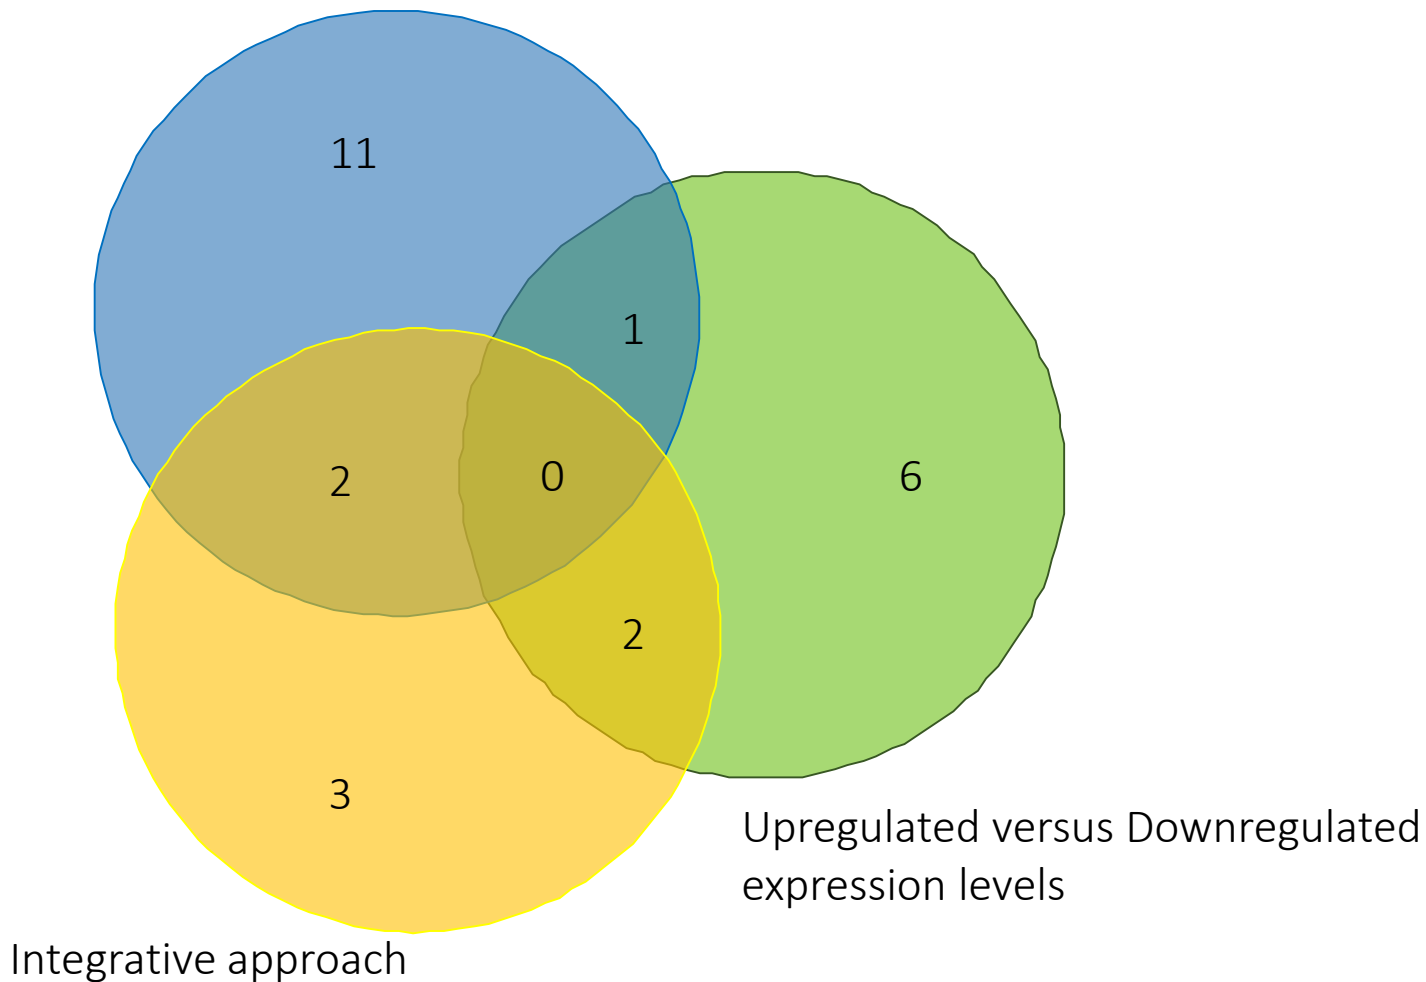

Supplement: 1471-2105-16-S4-S4-S6.pdf [file 1471-2105-16-S4-S4-S6.pdf]
